# Supplementary material for: Temporal evolution of main ambient PM 2.5 sources in Santiago, Chile, from 1998 to 2012
Source: Copernicus journal article supplement (doi:10.5194/acp-2017-18), 2017-01-18
Supplement: Supplementary file 1 [file acp-2017-18-supplement.pdf]

1 Supplementary figures

2

3 Supplementary figure 1 trend of number of motorized vehicles in Santiago city and the vehicles sold  
4 fuel. The data for number of motorized vehicles were provided by INE ([www.ine.cl](http://www.ine.cl)) and for the sold  
5 fuel by SEC ([www.sec.cl](http://www.sec.cl)).

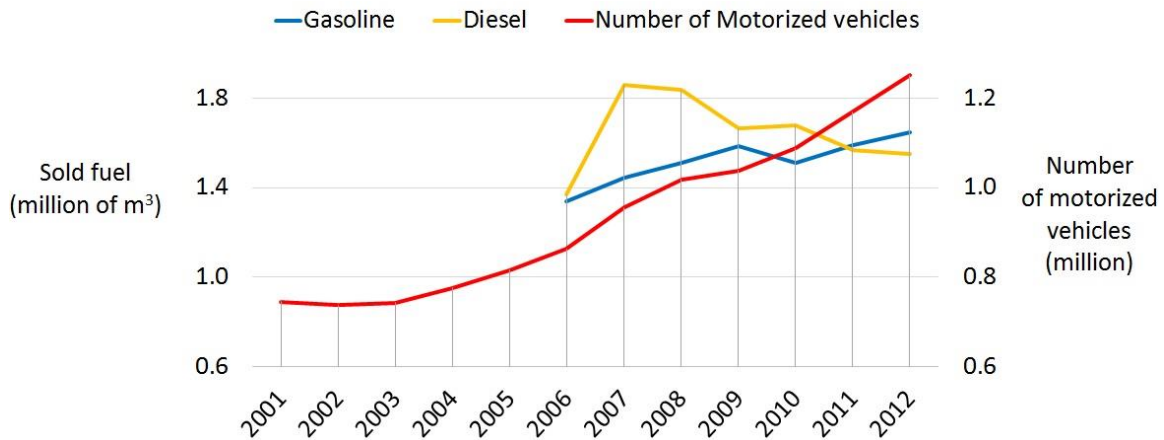

6

7 Supplementary figure 2 Trend of vehicles annual growth rate and contribution per vehicles for  
8 Santiago city. The data for number of motorized vehicles were provided by INE ([www.ine.cl](http://www.ine.cl))

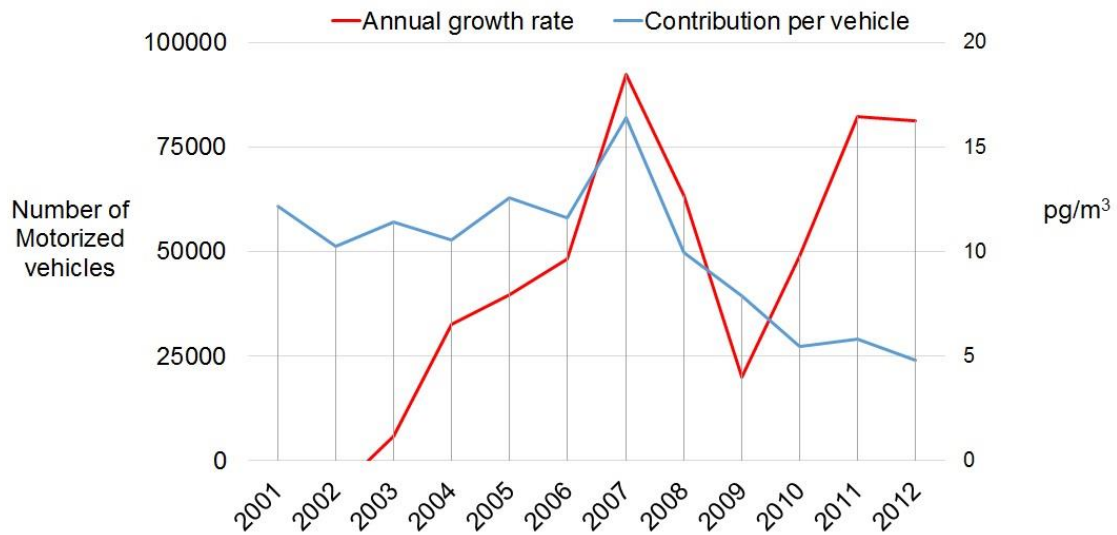

9

10
